# Supplementary material for: Feasibility randomised controlled trial comparing TRAK-ACL digital rehabilitation intervention plus treatment as usual versus treatment as usual for patients following anterior cruciate ligament reconstruction
Source: PubMed Central journal article supplement (PMC8103946; doi:10.1136/bmjsem-2020-001002), 2021-05-05
Supplement: bmjsem-2020-001002supp003.pdf [file bmjsem-2020-001002supp003.pdf]

### **Supplementary information 3 - Analysis of secondary outcomes**

#### **KOOS**

Each of the subscales of KOOS was analysed separately. KOOS Pain scores are shown in Table 1 for time point 0, 3 and 6 months. When comparing the two groups, TRAK-ACL and TAU, the intervention effect is measured by the p-value and 95% confidence intervals (95% CI). The mean difference in the intervention effect from baseline to 3 months for Pain was 3.97 (95% CI -1.803 to 9.756),  $p=0.172$  and 1.09 (-6.609 to 8.799),  $p=0.775$ , for baseline to 6 months. For KOOS Symptoms (Table 2) the intervention effect difference from baseline to 3 months was 1.49 (-5.603 to 8.596),  $p=0.673$  and -6.70 (-17.096 to 3.687),  $p=0.199$ , for baseline to 6 months. For KOOS activities of daily living (ADL) the intervention effect difference between baseline to 3 months was 2.54 (-1.936 to 7.018),  $p=0.258$  and 2.08 (-1.061 to 5.222),  $p=.188$  for baseline to 6 months. For KOOS sport and recreation (SportRec) the intervention effect difference between baseline and 3 months was 7.8 (-6.51 to 22.111),  $p=0.278$  and 2.27 (-10.007 to 14.560),  $p=0.71$  for baseline to 6 months. Finally, for KOOS quality of life (QOL) the intervention effect difference between 0 and 3 months was 4.94 (-4.060 to 13.948),  $p=0.274$  and -4.10 (-15.900 to 7.685),  $p=0.485$  for 0 to 6 months. The KOOS scores at each time point for the 4 key KOOS domains are shown in Figure x. In all cases no difference was found between TRAK-ACL and TAU.

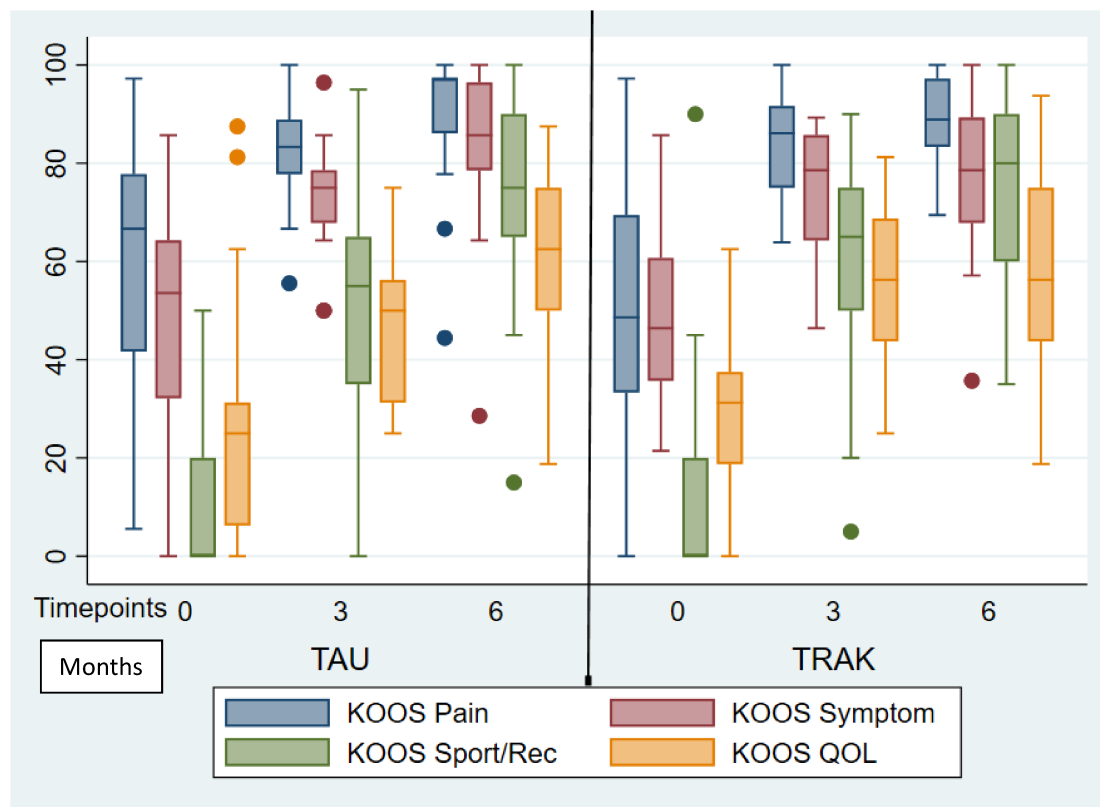

Figure x. Four domains of KOOS at 3 time points for TRAK and TAU.

#### Legend

TAU = Treatment as usual

TRAK= TRAK-ACL intervention arm

KOOS = Knee Osteoarthritis Outcome Score

QOL= Quality of Life

| Outcome                    | TAU<br>Summary Statistics<br>N= , Mean (SD) | TRAK<br>Summary Statistics<br>N= , Mean (SD) | Intervention Effect<br>Difference of means (95% CI) and p value |
|----------------------------|---------------------------------------------|----------------------------------------------|-----------------------------------------------------------------|
| <b>KOOS</b>                |                                             |                                              |                                                                 |
| KOOS Pain                  |                                             |                                              |                                                                 |
| 0                          | 25, 59.11 (24.00)                           | 26, 51.28 (24.79)                            |                                                                 |
| 3                          | 19, 82.31(10.68)                            | 25, 84.22(10.10)                             | 3.97 (-1.803, to 9.756) p= 0.172                                |
| 6                          | 17, 89.54(14.71)                            | 23, 89.37(09.57)                             | 1.09 (-6.609 to 8.799) p=0.775                                  |
| KOOS Symptoms              |                                             |                                              |                                                                 |
| 0                          | 25, 49.71(12.17)                            | 26, 47.12(17.02)                             |                                                                 |
| 3                          | 19, 72.93(11.12)                            | 25, 74.43(11.88)                             | 1.49 (-5.603 to 8.596) p=0.673                                  |
| 6                          | 17, 84.03(17.64)                            | 23, 77.33(14.79)                             | -6.70 (-17.096 to 3.687) p=0.199                                |
| KOOS ADL                   |                                             |                                              |                                                                 |
| 0                          | 25, 64.17(27.00)                            | 26, 57.35(25.29)                             |                                                                 |
| 3                          | 19, 91.87(08.06)                            | 25, 94.17(06.40)                             | 2.54 (-1.936 to 7.018) p=0.258                                  |
| 6                          | 17, 95.76(06.13)                            | 23, 97.44(03.61)                             | 2.08 (-1.061 to 5.222) p=0.188                                  |
| KOOS SportRec              |                                             |                                              |                                                                 |
| 0                          | 25, 9.8(14.10)                              | 26, 10.58(20.51)                             |                                                                 |
| 3                          | 19, 50 (23.51)                              | 25, 57.8 (23.14)                             | 7.80 (-6.51 to 22.111) p=0.278                                  |
| 6                          | 17, 72.94(22.01)                            | 23, 75.22(16.41)                             | 2.27 (-10.007 to 14.560) p=0.71                                 |
| KOOS QOL                   |                                             |                                              |                                                                 |
| 0                          | 25, 25.25(24.70)                            | 26, 28.37(17.87)                             |                                                                 |
| 3                          | 19, 47.69(15.48)                            | 25, 54.75(17.23)                             | 4.94 (-4.060 to 13.948) p=0.274                                 |
| 6                          | 17, 61.76(08.99)                            | 23, 59.23(20.10)                             | -4.10(-15.900 to 7.685) p=0.485                                 |
| <b>Self-Efficacy Score</b> |                                             |                                              |                                                                 |
| 0                          | 25, 7.27(1.65)                              | 26, 7.69(1.84)                               |                                                                 |
| 3                          | 19, 8.30(1.39)                              | 25, 8.43(1.00)                               | .126 (-0.601 to 0.854) p=0.728                                  |
| 6                          | 17, 8.50(1.50)                              | 23, 8.47(1.32)                               | -0.03 (-0.949 to 0.871) p= 0.932                                |

Table 1. Exploration of Intervention effect data, KOOS and Self-Efficacy

*KOOS: sample size calculation for a future trial*

The developers of the instrument recommend that when using the KOOS, a change of 8-10 is considered the minimal clinically important difference and the standard deviation is set to 15 (14, 17, 19, 20).

| Domain                  | Mean     | SD       |
|-------------------------|----------|----------|
| KOOS PAIN Baseline      | 55.11983 | 24.48464 |
| KOOS Symptom Baseline   | 48.38936 | 20.10576 |
| KOOS ADL Baseline       | 60.69781 | 26.11042 |
| KOOS Sport/Rec Baseline | 10.19608 | 17.49173 |
| KOOS QOL Baseline       | 26.83824 | 21.33418 |

|            |            |           |
|------------|------------|-----------|
| Mean KOOS5 | = 40.24826 |           |
| Mean KOOS4 | = 35.13588 |           |
| SD KOOS5   |            | = 18.4658 |
| SD KOOS4   |            | = 17.2671 |

Table x. Means and SD for KOOS at baseline

The SD of 17.2671 from this feasibility trial compares reasonably to similar studies (20) (21) (22) (23). Therefore the primary outcome of a future substantive RCT would be the KOOS at 6 months follow up.

#### **Self-Efficacy Score**

The difference in the intervention effect from baseline to 3 months for the Self Efficacy score was .126 (-0.601, 0.854),  $p=0.728$  and -.03 (-0.949 - 0.871),  $p= .932$  for baseline to 6 months.
